# Supplementary material for: The synthesis of core–shell Cu9S5@mSiO2–ICG@PEG–LA for photothermal and photodynamic therapy
Source: Royal Society of Chemistry journal article supplement (doi:10.1039/c8nj03712d), 2018-01-01
Supplement: c8nj03712d1.pdf [file c8nj03712d1.pdf]

## Supporting information

### The synthesis of core-shell $\text{Cu}_9\text{S}_5@\text{mSiO}_2\text{-ICG@PEG-LA}$ for photothermal and photodynamic therapy

Na An, Ying Wang, Meng Li, Huiming Lin,\* and Fengyu Qu\*

*Key Laboratory of Photochemical Biomaterials and Energy Storage Materials,  
Heilongjiang Province , College of Chemistry and Chemical Engineering, Harbin  
Normal University, Harbin, 150025, P. R. China*

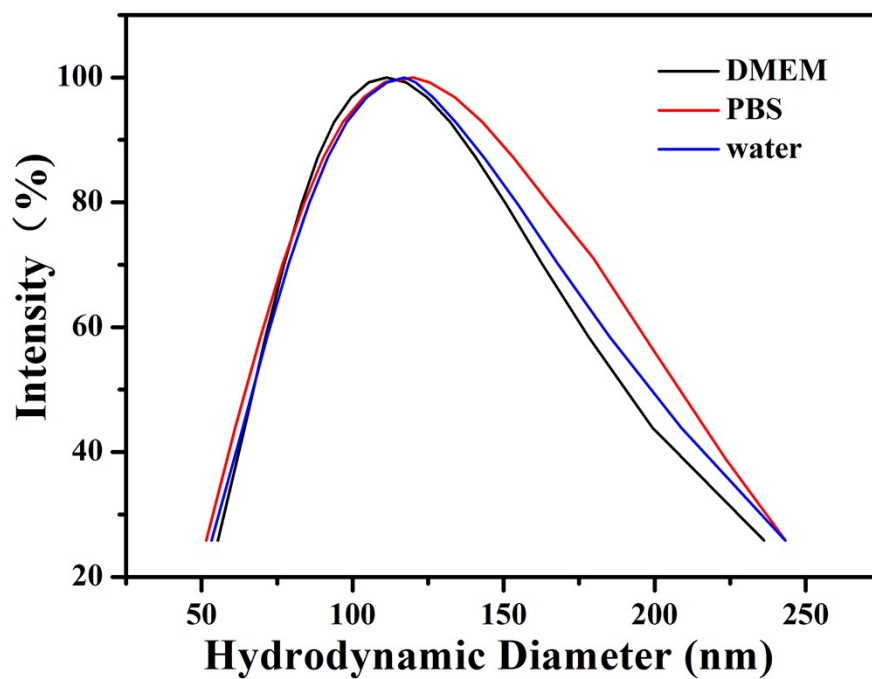

Fig. S1 The DLS analysis of  $\text{Cu}_9\text{S}_5@\text{mSiO}_2\text{-ICG@PEG-LA}$  in water, PBS and DMEM solution. There are not obvious changes between these media, showing the well dispersed stability of  $\text{Cu}_9\text{S}_5@\text{mSiO}_2\text{-ICG@PEG-LA}$ .
